# Supplementary material for: Quantitative chemical proteomics reveals a Plk1 inhibitor-compromised cell death pathway in human cells
Source: PubMed Central journal article supplement — Cell Res. 2014 Jul 1;24(9):1141–5. doi: 10.1038/cr.2014.86 (PMC4152744; doi:10.1038/cr.2014.86), 2014-07-01
Supplement: cr201486x1.pdf [file cr201486x1.pdf]

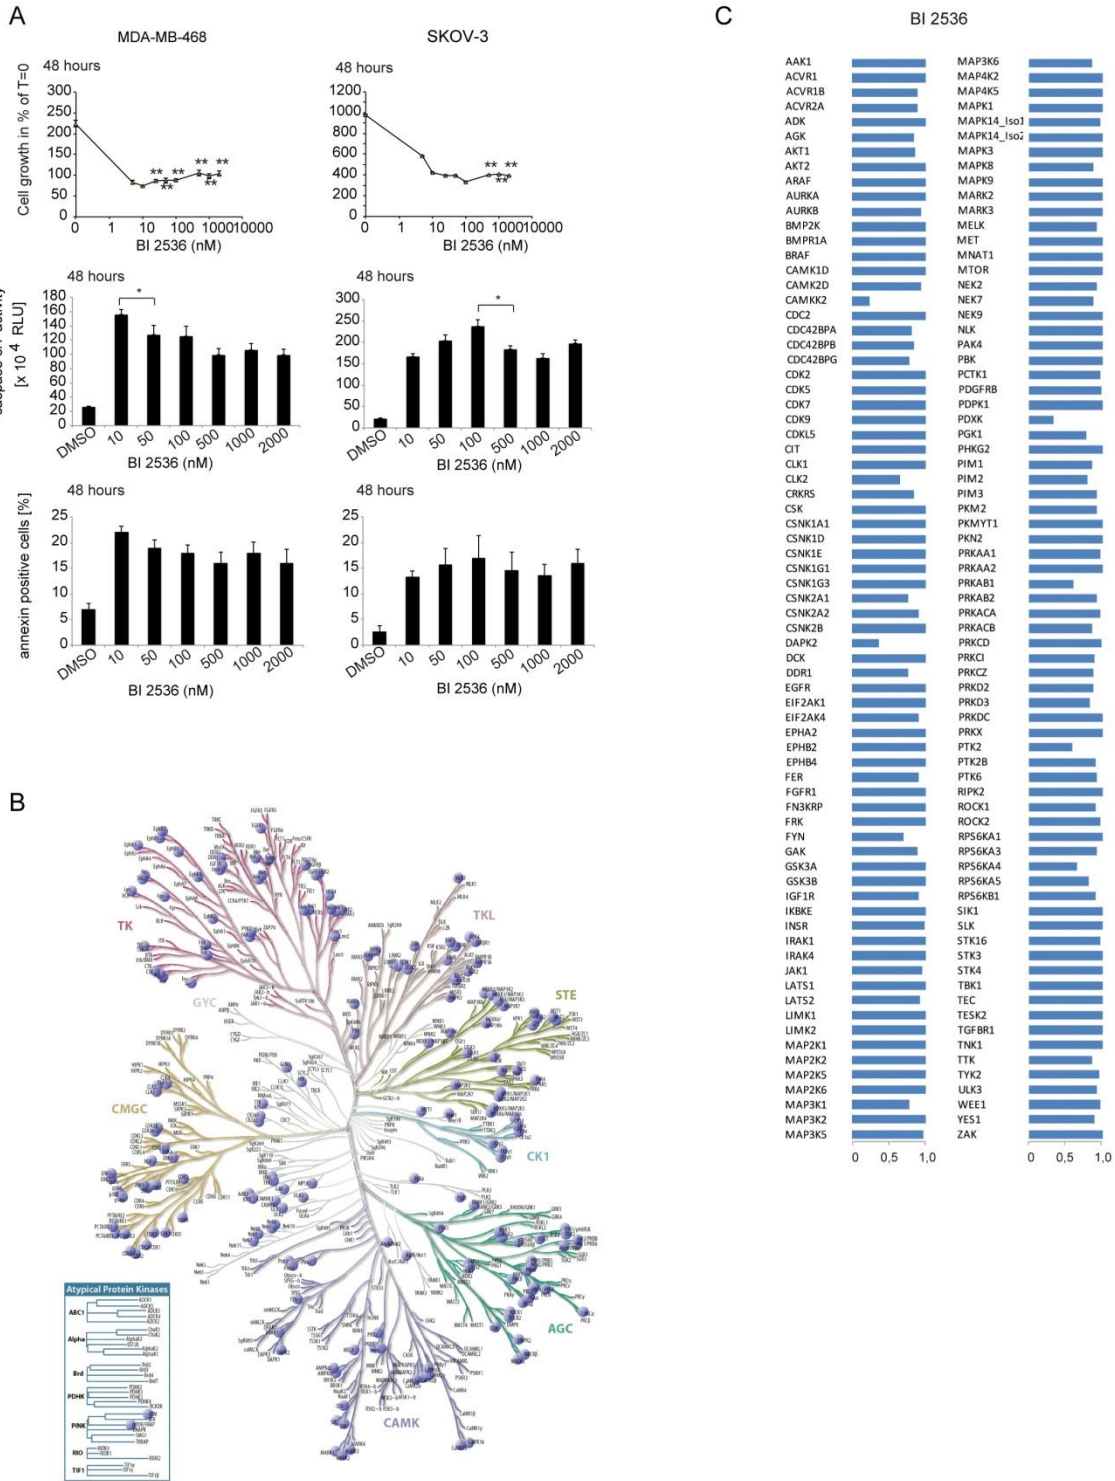

Figure S1

D

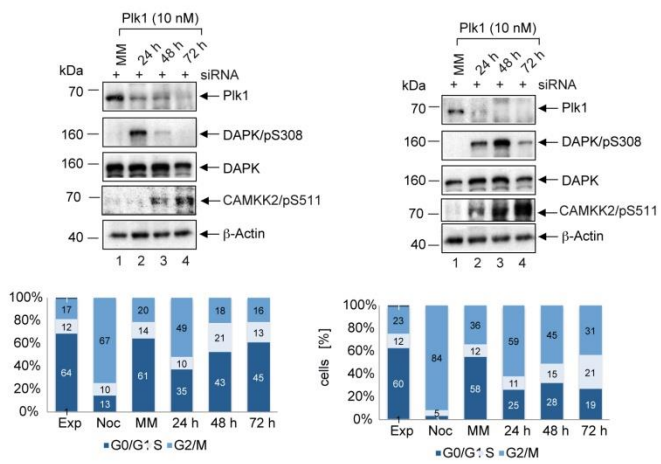

E

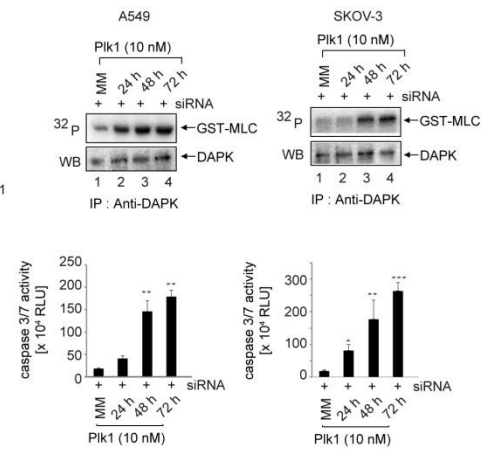

F

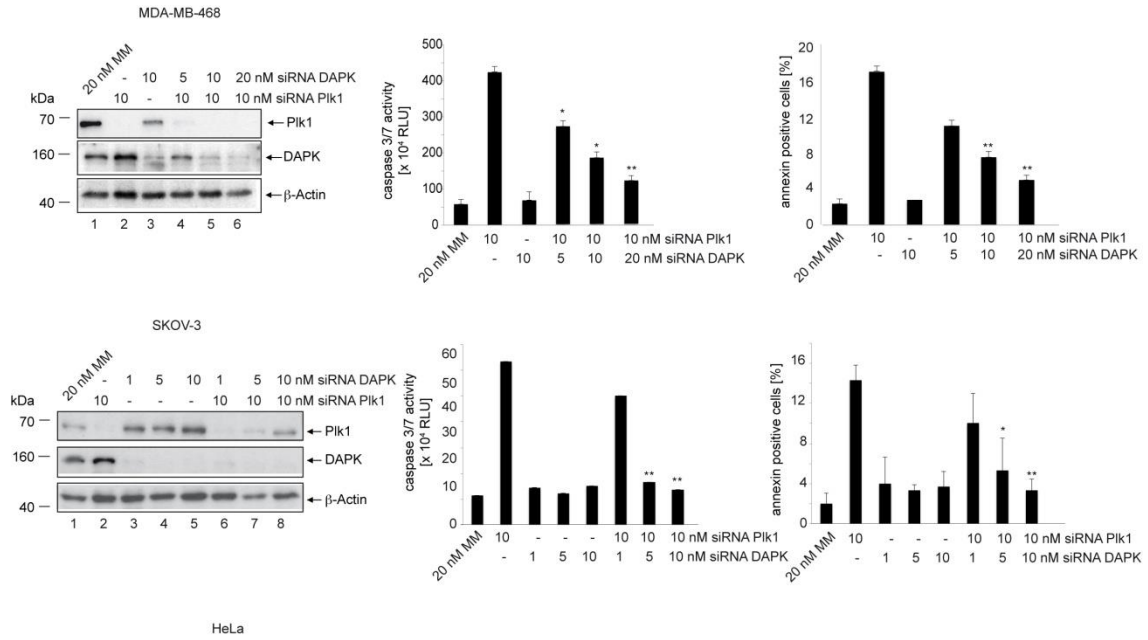

G

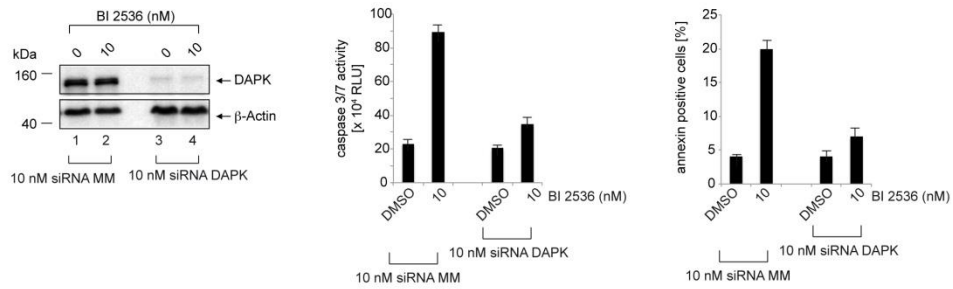

Figure S1

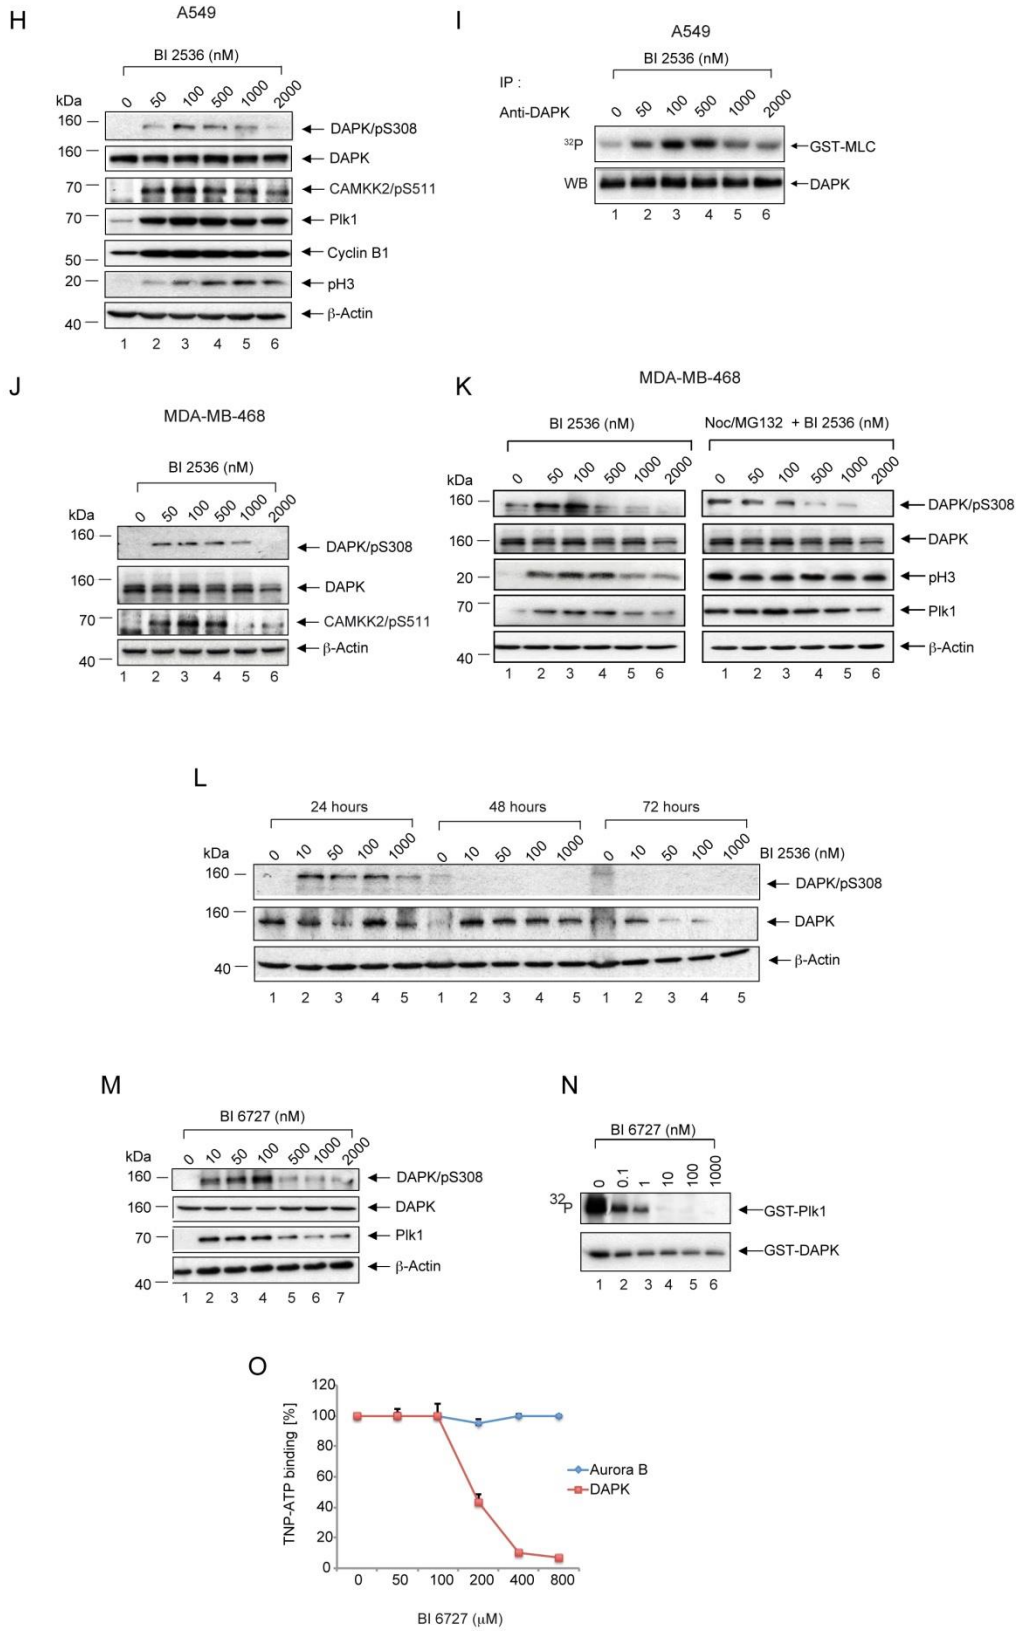

Figure S1

**Supplementary information, Figure S1 (A)** Cell proliferation was measured by Cell Titer Blue assay® for MDA-MB-468 and SKOV-3 cells. Concentration-dependent, apoptotic response of MDA-MB-468 and SKOV-3 cells. Caspase-3/7 activity was determined in the cell lysates of cells treated at increasing concentrations of BI2536 using the Caspase-Glo® 3/7 Assay (mean values of three independent experiments for each concentration) and 7-AAD was used in conjunction with annexin V staining to discriminate among the viable, apoptotic and necrotic cells using dual parameter FACS analysis (mean values of three independent experiments for each concentration). DMSO is used as the control treatment. **(B)** Proteomic profiling of the Plk1 inhibitor BI2536 by the Kinobead competition assay. Kinobeads coverage of the kinome. The quantitative mass spectrometric analysis of Kinobead competition assays of HeLa cells treated with 250 nM Plk1 inhibitors identified 146 human kinases across all branches of the phylogenetic tree. **(C)** Kinase-binding profiles of BI2536 (blue) across the panel of identified kinases. The length of the bars represents the percentage of activity indicated at the bottom. **(D)** Regulation and activity of DAPK in Plk1-depleted cells. A549 (lung cancer) or SKOV-3 (ovarian cancer) cells were transfected with siRNA Plk1 mismatch (MM) as control or siRNA Plk1 and analyzed at 24 h, 48 h and 72 h after transfection. Lysates were immunoblotted for Plk1, DAPK/pS308, DAPK, CAMKK2/pS511, and  $\beta$ -Actin (upper panel). The cell cycle distribution was analyzed by FACS (lower panel). **(E)** Immunoprecipitated DAPK from the lysates of siRNA-treated cells was subjected to kinase assays using GST-Myosin light chain (MLC) as the substrate (upper panel) and caspase-3/7 activity was determined using the Caspase-Glo® 3/7 Assay (lower panel). \* $P$ <0.05, \*\* $P$ <0.01, \*\*\* $P$ <0.001, Student's  $t$ -test, unpaired and two-tailed. **(F)** Co-depletion of Plk1 and DAPK in cancer cells. MDA-MB-468 or SKOV-3 cells were transfected with siRNA MM as control, siRNA Plk1, siRNA DAPK, or a combination of siRNA DAPK and siRNA Plk1. Lysates were harvested and analyzed by immunoblotting for Plk1, DAPK and  $\beta$ -Actin. For all panels, one image representative of three independent experiments is shown (left panel). Caspase-3/7 activity was determined using the Caspase-Glo® 3/7 Assay (middle panel) and 7-AAD was used in conjunction with annexin V staining to discriminate among the viable, apoptotic and necrotic cells using dual parameter FACS analysis (right panel). \* $P$ <0.05, \*\* $P$ <0.01, Student's  $t$ -test,

unpaired and two-tailed. **(G)** HeLa cells were transfected with siRNA MM as control or siRNA DAPK followed by the treatment with 10 nM BI2536 for 48 h. Lysates were harvested and analyzed by immunoblotting for DAPK and  $\beta$ -Actin. For all panels, one image representative of three independent experiments is shown (left panel). Caspase-3/7 activity was determined using the Caspase-Glo<sup>®</sup> 3/7 Assay (middle panel) and 7-AAD was used in conjunction with annexin V staining to discriminate among the viable, apoptotic and necrotic cells using dual parameter FACS analysis (right panel). **(H)** Determination of DAPK activities in cancer cells. Lysates of A549 cells treated with increasing concentrations of BI2536 were immunoblotted for DAPK/pS308, DAPK, CAMKK2/pS511, Plk1, Cyclin B1, pH3 and  $\beta$ -Actin. **(I)** The immunoprecipitated DAPK from A549 cell lysates was subjected to kinase assays and monitored for phosphorylation of GST-MLC. **(J)** Lysates of MDA-MB-468 cells treated with increasing concentrations of BI2536 were immunoblotted for DAPK/pS308, DAPK, CAMKK2/pS511, and  $\beta$ -Actin. **(K)** MDA-MB-468 cells enriched in mitosis by nocodazole- or nocodazole/proteasome inhibitor MG132-treatment were incubated with increasing concentrations of BI2536 and lysates were immunoblotted for DAPK/pS308, DAPK, pH3, Plk1 and  $\beta$ -Actin. **(L)** Lysates of HeLa cells treated with increasing concentrations of BI2536 for 24 h, 48 h and 72 h were immunoblotted for DAPK/pS308, DAPK, and  $\beta$ -Actin. **(M)** Lysates of cells treated with increasing concentrations of BI6727 were immunoblotted for DAPK/pS308, DAPK, Plk1, and  $\beta$ -Actin. **(N)** Evaluation of Plk1 and DAPK activities at increasing concentrations of BI6727 using *in vitro* kinase assays. **(O)** TNP-ATP displacement assay for the analysis of BI6727 binding to DAPK and Aurora B.

**Supplementary information, Table S1** Percentage of kinase inhibition following treatment with 250 nM BI2536.

|         | %  |
|---------|----|
| CAMKK2  | 76 |
| CLK2    | 33 |
| DAPK2   | 63 |
| MAPK3   | 22 |
| PDXK    | 66 |
| PTK2    | 40 |
| RPS6KA4 | 34 |
